# Supplementary material for: Sam68 promotes hepatic gluconeogenesis via CRTC2
Source: Nat Commun. 2021 Jun 7;12:3340. doi: 10.1038/s41467-021-23624-9 (PMC8185084; doi:10.1038/s41467-021-23624-9)
Supplement: Supplementary file 1 — Supplementary Information [file 41467_2021_23624_MOESM1_ESM.pdf]

## **Sam68 promotes hepatic gluconeogenesis via CRTC2**

Aijun Qiao<sup>1</sup>, Junlan Zhou<sup>2</sup>, Shiyue Xu<sup>1</sup>, Wenxia Ma<sup>1</sup>, Chan Boriboun<sup>1</sup>, Teayoun Kim<sup>3</sup>, Baolong Yan<sup>1</sup>, Jianxin Deng<sup>1</sup>, Liu Yang<sup>1</sup>, Eric Zhang<sup>1</sup>, Yuhua Song<sup>1</sup>, Yongchao C. Ma<sup>4</sup>, Stephane Richard<sup>5</sup>, Chunxiang Zhang<sup>1</sup>, Hongyu Qiu<sup>6</sup>, Kirk M Habegger<sup>3</sup>, Jianyi Zhang<sup>1</sup>, Gangjian Qin<sup>1,2\*</sup>

<sup>1</sup> Department of Biomedical Engineering, University of Alabama at Birmingham, School of Medicine and School of Engineering, Birmingham, AL 35294, USA

<sup>2</sup> Feinberg Cardiovascular Research Institute, Northwestern University Feinberg School of Medicine, Chicago, IL 60611, USA

<sup>3</sup> Department of Medicine - Endocrinology, Diabetes & Metabolism, University of Alabama at Birmingham, School of Medicine, Birmingham, AL 35294, USA

<sup>4</sup> Departments of Pediatrics, Neurology and Physiology, Northwestern University Feinberg School of Medicine, Anne & Robert H. Lurie Children's Hospital of Chicago, Chicago, IL, 60611, USA

<sup>5</sup> Lady Davis Institute for Medical Research, McGill University, Montreal, Quebec, Canada

<sup>6</sup> Center of Molecular and Translational Medicine, Institution of Biomedical Science, Georgia State University, Atlanta, GA 30303, USA

## **Supplementary Information**

### **Supplementary Figures**

**Figure S1**

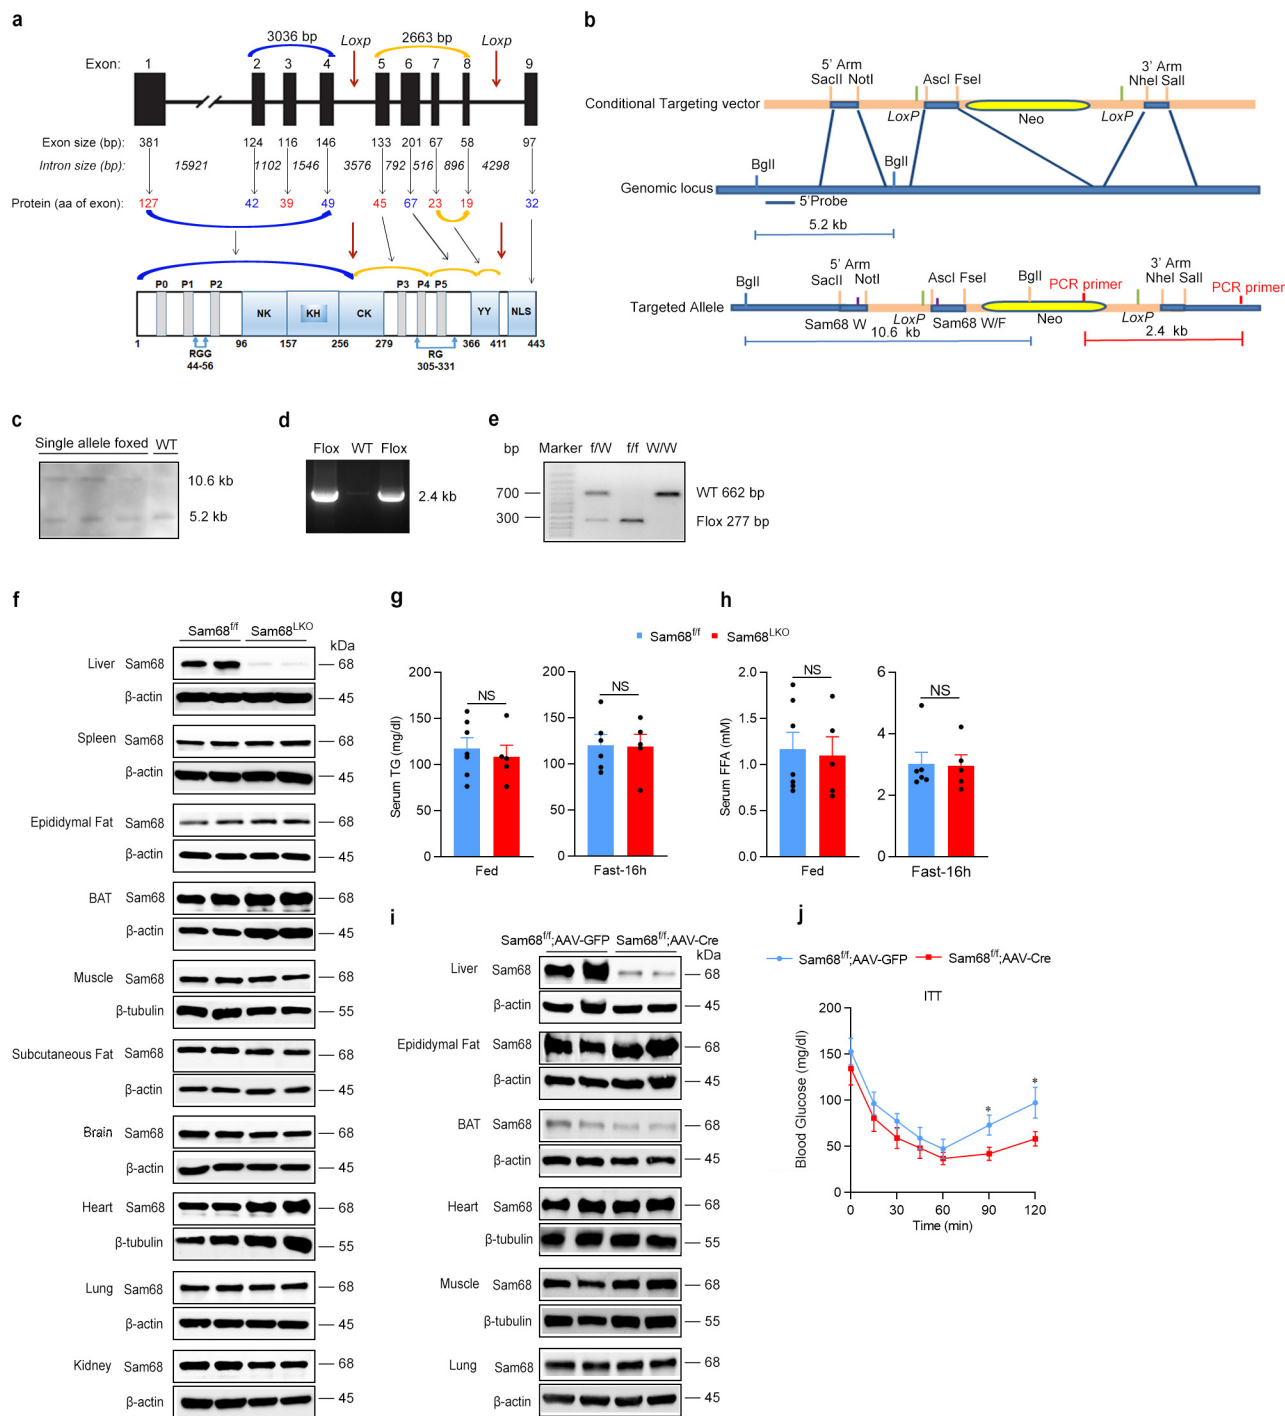

**Supplementary Fig. 1: Generation and metabolic characterization of hepatocyte-specific *Sam68* knockout mice.** (a) The structural components of the *Sam68* gene (*upper* panel) and protein (*lower* panel) are illustrated. *Sam68* contains a GSG domain composed of a single RNA-binding KH domain flanked by NK (N-terminus of KH) and CK (C-terminus of KH) segments; six consensus proline-rich motifs (P0-P5); RGG boxes; a C-terminal tyrosine-rich domain (YY), and a nuclear localization signal (NLS). Amino acid positions are numbered across the bottom of the protein structure. (b) The gene-targeting strategy for floxing exons 5-8 of *Sam68* in embryonic stem (ES) cells is illustrated. (c) Southern blotting and (d) PCR analyses were conducted to confirm that the ES clones were correctly targeted. (e) The genotypes of the WT and floxed alleles were confirmed via PCR. (f) *Sam68* protein expression was evaluated via Western blot in the liver, spleen, epididymal fat, brown fat, skeletal muscle, subcutaneous fat, brain, heart, lung, and kidney tissues of *Sam68*<sup>LKO</sup> and *Sam68*<sup>ff</sup> mice. (g) Serum triglyceride and (h) free fatty acid levels were measured in *Sam68*<sup>LKO</sup> and *Sam68*<sup>ff</sup> mice under feeding (*Sam68*<sup>ff</sup>, n=7; *Sam68*<sup>LKO</sup>, n=5) or 16-h fasting condition (*Sam68*<sup>ff</sup>, n=6; *Sam68*<sup>LKO</sup>, n=5). (i) *Sam68*<sup>ff</sup> mice were injected with AAV8-TBG-iCre (*Sam68*<sup>ff</sup>;AAV-Cre) to induce a hepatic-specific *Sam68* deletion or with control AAV8-TBG-eGFP (*Sam68*<sup>ff</sup>;AAV-GFP). Three weeks later, *Sam68* protein levels were evaluated via Western blot in the liver, epididymal fat, brown fat, heart, skeletal muscle, and lung tissues. (j) Blood glucose levels were measured in *Sam68*<sup>ff</sup>;AAV-Cre (n=8) and *Sam68*<sup>ff</sup>;AAV-GFP (n=8) mice at the indicated time points during the ITT. Data are expressed as mean ± standard error of the mean (s.e.m.). \*p<0.05 (g-h, unpaired two-sided *t* test; j, two-way ANOVA). Source data are provided as a Source Data file.

**Figure S2**

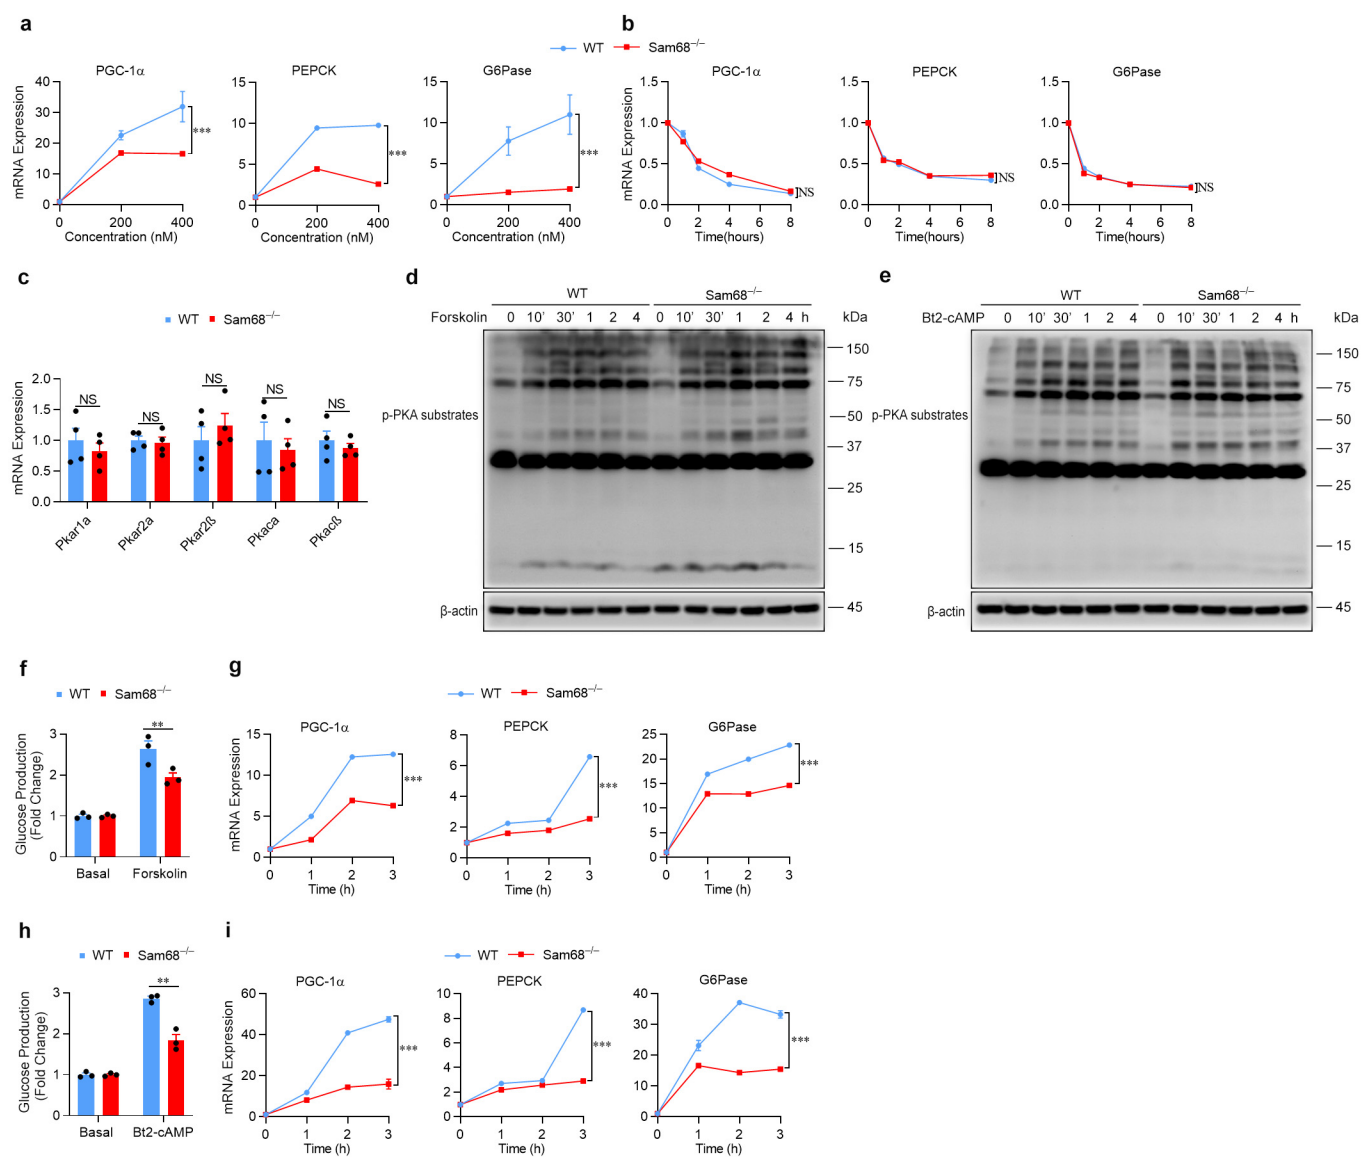

**Supplementary Fig. 2: *Sam68* deficiency reduces glucagon signaling and glucose production in hepatocytes.** (a) WT and *Sam68*<sup>-/-</sup> hepatocytes were treated with 200 nM and 400 nM glucagon for 3 h (n=3), and then the mRNA expression of gluconeogenic genes was measured via qRT-PCR. (b) WT and *Sam68*<sup>-/-</sup> hepatocytes were treated with glucagon (100 nM) for 3 h and then with Actinomycin D (10 µg/mL) to block new mRNA synthesis; mRNA expression of gluconeogenic genes was measured 0-8 h later (n=3). (c) mRNA expression of PKA subunits was measured in WT and *Sam68*<sup>-/-</sup> hepatocytes (n=4). (d-e) WT and *Sam68*<sup>-/-</sup> primary hepatocytes were treated with (d) forskolin (10 µM) or (e) Bt2-cAMP (100 µM) for 0-30 min and 1-4 h; then, protein levels of phosphorylated PKA substrates was evaluated via Western blot. (f) Glucose production was measured in WT and *Sam68*<sup>-/-</sup> primary hepatocytes after treatment with forskolin for 4 h (n=3). (g) mRNA expression of gluconeogenic genes was measured in WT and *Sam68*<sup>-/-</sup> hepatocytes after treatment with forskolin for 0-3 h (n=3). (h) Glucose production was measured in WT and *Sam68*<sup>-/-</sup> primary hepatocytes after treatment with Bt2-cAMP for 4 h (n=3). (i) mRNA expression of gluconeogenic genes was measured in WT and *Sam68*<sup>-/-</sup> hepatocytes after treatment with Bt2-cAMP for 0-3 h (n=3). Data are expressed as mean ± standard error of the mean (s.e.m.). \*p<0.05, \*\*p<0.01, \*\*\*p<0.001, NS, not significant (a-b, f-i: two-way ANOVA; c: unpaired two-sided *t* test). “n” denotes biologically independent primary hepatocyte samples. Source data are provided as a Source Data file.

**Figure S3**

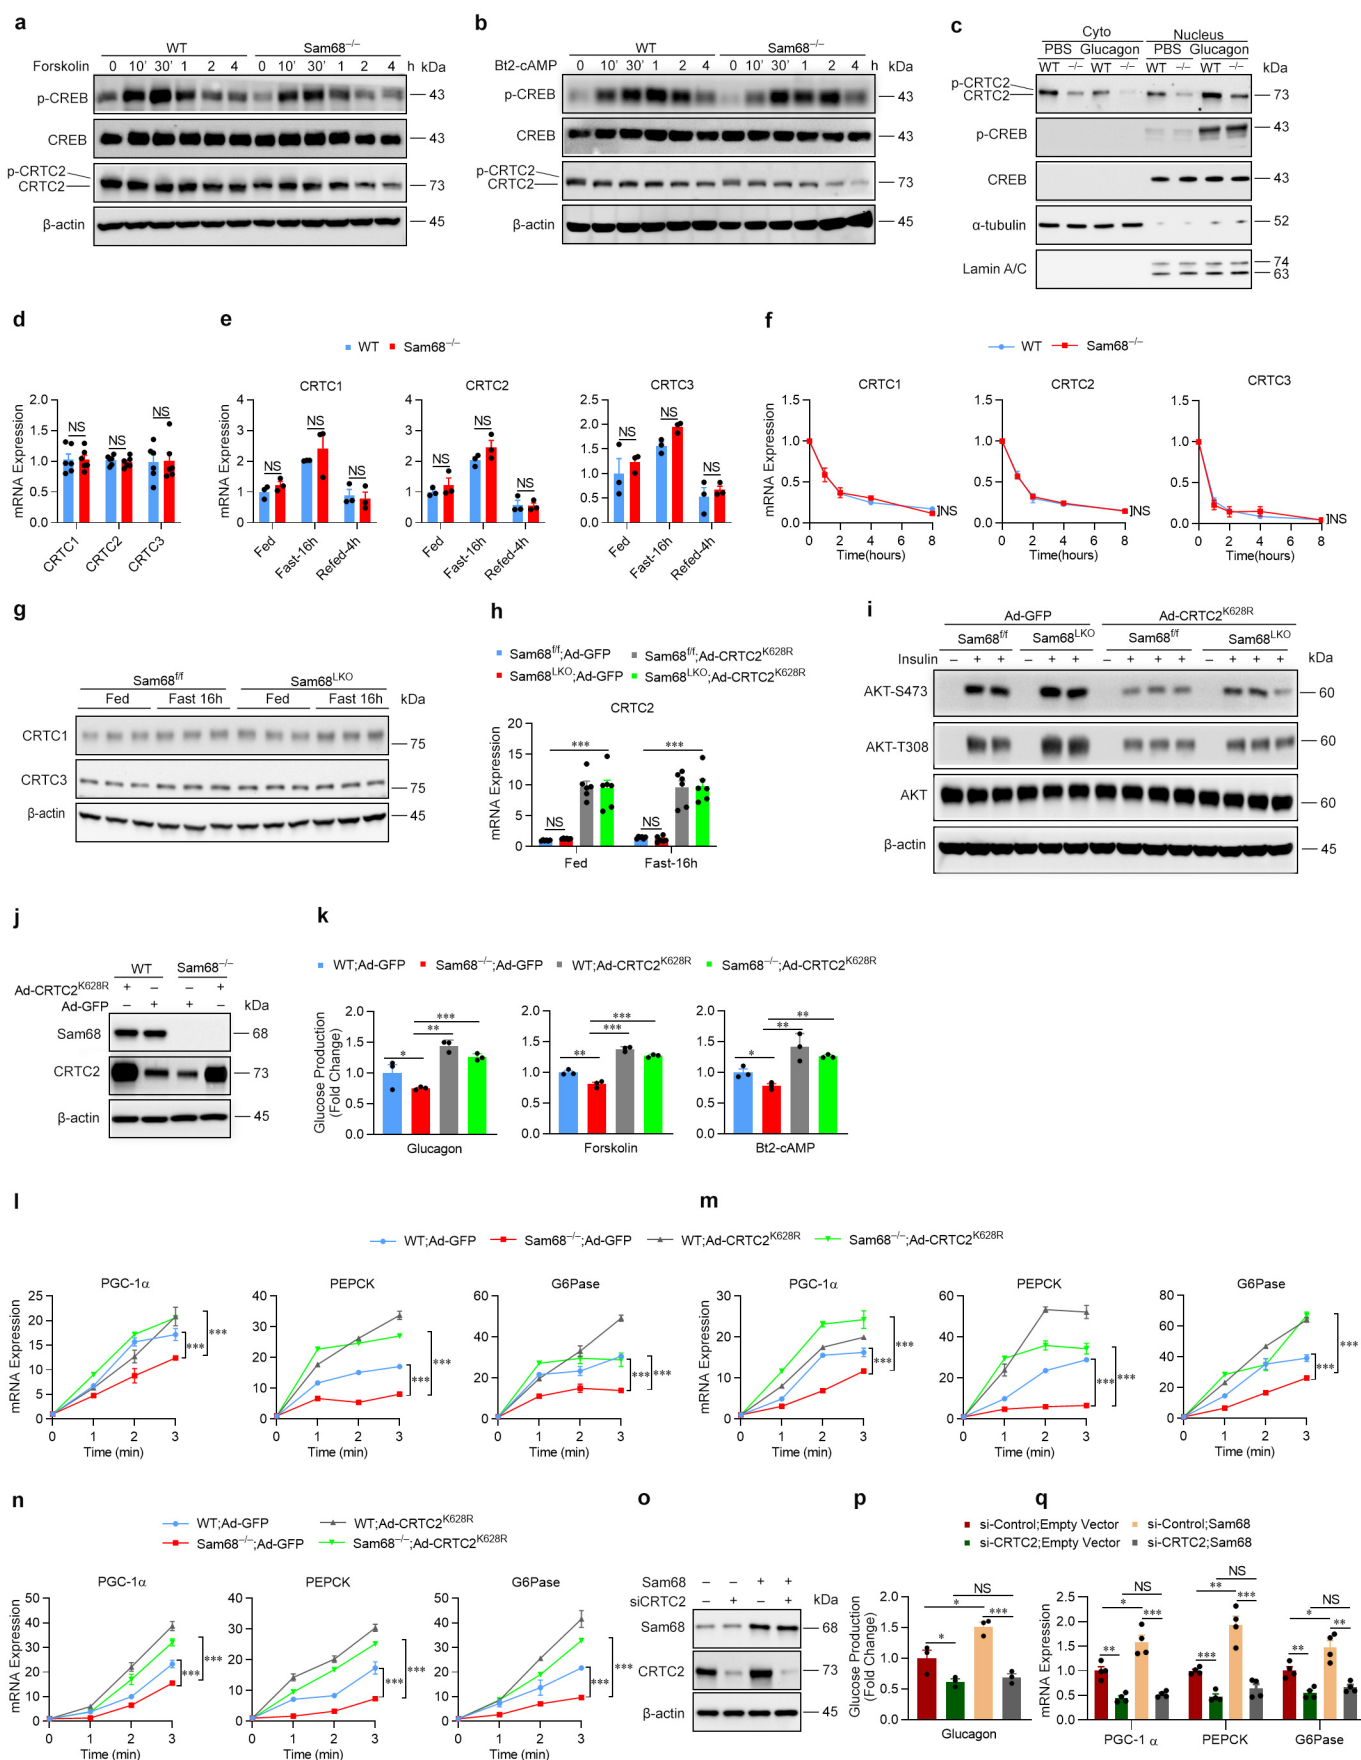

**Supplementary Fig. 3: Hepatic *Sam68* deficiency reduces glucagon signaling and CRTC2 protein stability.** (a-b) WT and *Sam68*<sup>-/-</sup> primary hepatocytes were treated with (a) forskolin (10  $\mu$ M) and (b) Bt2-cAMP (100  $\mu$ M) for 0-30 min and 1-4 h; then, protein levels of phosphorylated CREB (p-CREB), total CREB, and CRTC2 were evaluated via Western blot. (c) WT and *Sam68*<sup>-/-</sup> primary hepatocytes were treated with PBS or glucagon (100 nM) for 30 min; then, protein levels of p-CREB, total CREB, and CRTC2 in nuclear and cytoplasmic extracts were evaluated by immunoblot. (d-e) mRNA expression of *CRTC1*, *CRTC2*, and *CRTC3* was evaluated via qRT-PCR in (d) WT and *Sam68*<sup>-/-</sup> primary hepatocytes (n=6) and in (e) liver tissue from WT and *Sam68*<sup>-/-</sup> mice (n=3) under feeding conditions, after 16 h of fasting, and after 16 h of fasting followed by 4 h of refeeding. (f) mRNA expression of *CRTC1*, *CRTC2*, and *CRTC3* was evaluated in WT and *Sam68*<sup>-/-</sup> hepatocytes after treatment with Actinomycin D (10  $\mu$ g/mL) for 0-8h to block new mRNA synthesis (n=3). (g) Protein expression of CRTC1 and CRTC3 was evaluated by Western blotting in the liver of *Sam68*<sup>LKO</sup> and *Sam68*<sup>ff</sup> mice under feeding condition or after 16 h fasting. (h-i) *Sam68*<sup>LKO</sup> and *Sam68*<sup>ff</sup> mice were administered Ad-GFP or Ad-CRTC2<sup>K628R</sup>. (h) Four days later, mice were sacrificed under feeding conditions or after 16 h of fasting, and *CRTC2* mRNA expression was evaluated in liver tissues (n=6). (i) Four days after Ad-GFP or Ad-CRTC2<sup>K628R</sup> administration, mice were treated with (+) or without (-) insulin (1 mU/g), and protein levels of phosphorylated AKT (at amino acids S473 and T308) and total AKT were evaluated 20 min later. (j-n) WT and *Sam68*<sup>-/-</sup> primary hepatocytes were treated with Ad-GFP or mutant Ad-CRTC2<sup>K628R</sup>; 48 h later, (j) CRTC2 protein expression was evaluated via Western blot, (k) glucose production was measured after treatment with glucagon (100 nM), forskolin (10  $\mu$ M) or Bt2-cAMP (100  $\mu$ M) for 4 h, and (l-n) mRNA expression of gluconeogenic genes was evaluated after treatment with (l) glucagon, (m) forskolin, or (n) Bt2-cAMP for 0-3 h (n=3). (o-q) HepG2 cells were co-transfected with a *Sam68*-expressing or empty plasmid and a CRTC2 or scrambled siRNA for 48 h, then treated with glucagon for 4 h, followed by assessments of (o) *Sam68* and CRTC2 protein expression, (p) glucose production (n=3), and (q) gluconeogenesis gene expression (n=4). Data are expressed as mean  $\pm$  standard error of the mean (s.e.m.). \*p<0.05, \*\*p<0.01, \*\*\*p<0.001, NS, not significant (d: unpaired two-sided *t* test; e-f, h, k-n, p-q: two-way ANOVA). "n" denotes biologically independent primary hepatocyte samples or liver tissues or independently transfected HepG2 cell samples. Source data are provided as a Source Data file.

**Figure S4**

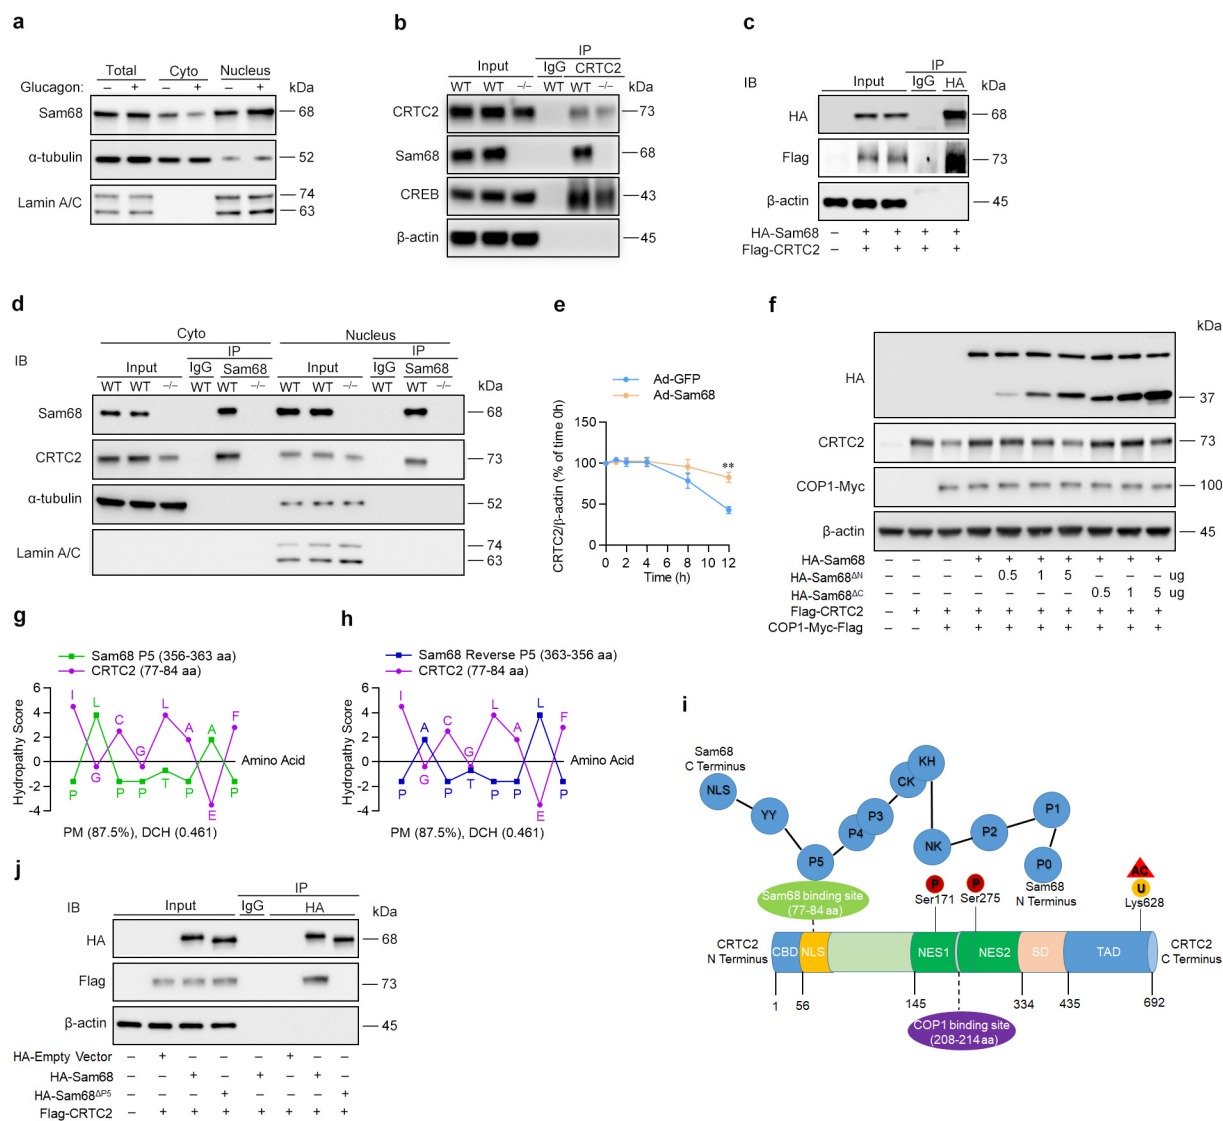

**Supplementary Fig. 4: Sam68 interacts directly with CRTC2.** (a) WT primary hepatocytes were treated with glucagon (100 nM) or PBS for 30 min, then, Sam68 protein levels were evaluated in nuclear and cytoplasmic fractions by immunoblot. (b) WT and *Sam68*<sup>-/-</sup> primary hepatocytes were treated with glucagon (100 nM) for 30 min; then, CRTC2 was immunoprecipitated, and Sam68 was detected in the precipitate by immunoblot. (c) 293T cells were co-transfected with plasmids coding for HA-tagged Sam68 and Flag-tagged CRTC2; 48 h later, Sam68 was immunoprecipitated from the cells with anti-HA, and CRTC2 was detected in the precipitates by immunoblotting with anti-Flag. (d) Nuclear and cytoplasm protein extracts were isolated from WT and *Sam68*<sup>-/-</sup> primary hepatocytes; Sam68 was immunoprecipitated, and CRTC2 in the precipitate of each fraction was detected by immunoblot. (e) WT primary hepatocytes were transduced with Ad-GFP or Ad-Sam68, treated by cycloheximide (100  $\mu$ M) for 0-12 h; then CRTC2 protein levels were evaluated by Western blot, quantified via NIH image J software, normalized to  $\beta$ -actin levels, and reported as the proportion of the amount present at 0 h. Data are expressed as mean  $\pm$  standard error of the mean (s.e.m.). \*\* $p < 0.001$  (two-way ANOVA). (f) HepG2 cells were co-transfected with three plasmids, one coding for Flag-tagged CRTC2, one for Myc-Flag-tagged COP1, and one for HA-tagged WT Sam68 or for Sam68 <sup>$\Delta$ N</sup> or Sam68 <sup>$\Delta$ C</sup> mutant; 48 h later, protein levels of CRTC2, COP1, and Sam68 or Sam68 <sup>$\Delta$ N</sup> or Sam68 <sup>$\Delta$ C</sup> were evaluated via immunoblotting with anti-CRTC2, anti-Myc, and anti-HA antibodies, respectively. (g-i) Computational results from text pattern search and hydropathy analyses show that P5 domain in the C-terminus of Sam68 has 87.5% hydropathic complementarity/percent match (PM) and 0.461 degree of complementary hydropathy (DCH) with the N-terminus of CRTC2 (amino acids 77-84) in a palindromic manner (g and h), suggesting a model that P5 domain in Sam68 binds N-terminal nuclear localization domain of CRTC2 (amino acids 77-84) (i). (j) 293T cells were co-transfected with two plasmids, one coding for Flag-tagged CRTC2 and one for HA-tagged WT Sam68, HA-tagged Sam68 <sup>$\Delta$ P5</sup>, or HA only; 48 h later, HA was immunoprecipitated from the cells, and CRTC2 in the precipitates was detected by immunoblotting with anti-Flag. Source data are provided as a Source Data file.

Figure S5

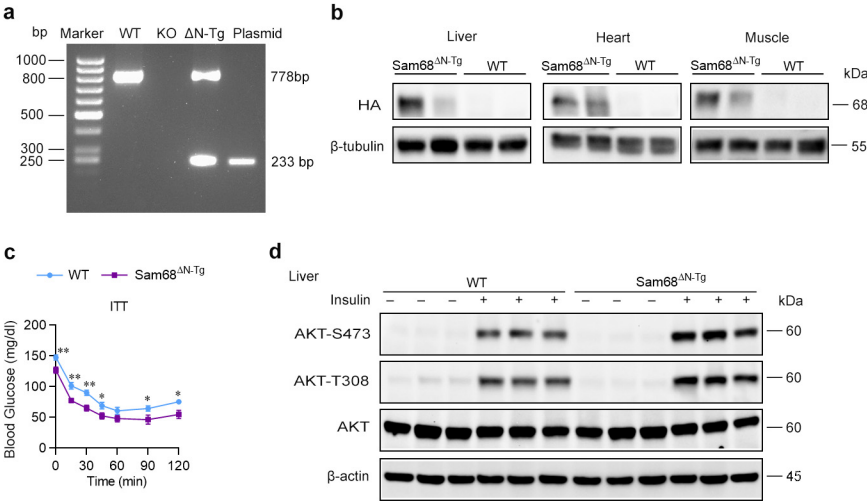

**Supplementary Fig. 5: Generation and metabolic characterization of *Sam68* <sup>$\Delta$ N-Tg</sup> mice.**

Experiments were conducted in mice carrying an HA-tagged  $\Delta$ N-truncated Sam68 mutation (*Sam68* <sup>$\Delta$ N-Tg</sup>) and their WT littermates. (a) The genotypes of WT and *Sam68* <sup>$\Delta$ N-Tg</sup> mice were confirmed via PCR. (b) Expression of the Sam68 <sup>$\Delta$ N</sup> mutant protein was evaluated in the liver, heart, and skeletal muscle tissues of *Sam68* <sup>$\Delta$ N-Tg</sup> and WT mice via immunoblot with anti-HA. (c) Blood glucose levels during the insulin tolerance test (ITT) were measured in *Sam68* <sup>$\Delta$ N-Tg</sup> (n=9) and WT (n=11) mice. (d) *Sam68* <sup>$\Delta$ N-Tg</sup> and WT mice were treated with (+) or without (–) insulin (1 U/kg); 20 minutes later, liver tissues were harvested and protein levels of phosphorylated AKT (at amino acids S473 and T308) and total AKT were evaluated by Western blot (n=3). Data are expressed as mean  $\pm$  standard error of the mean (s.e.m.). \*p<0.05, \*\*p<0.01 (two-way ANOVA). Source data are provided as a Source Data file.

Figure S6

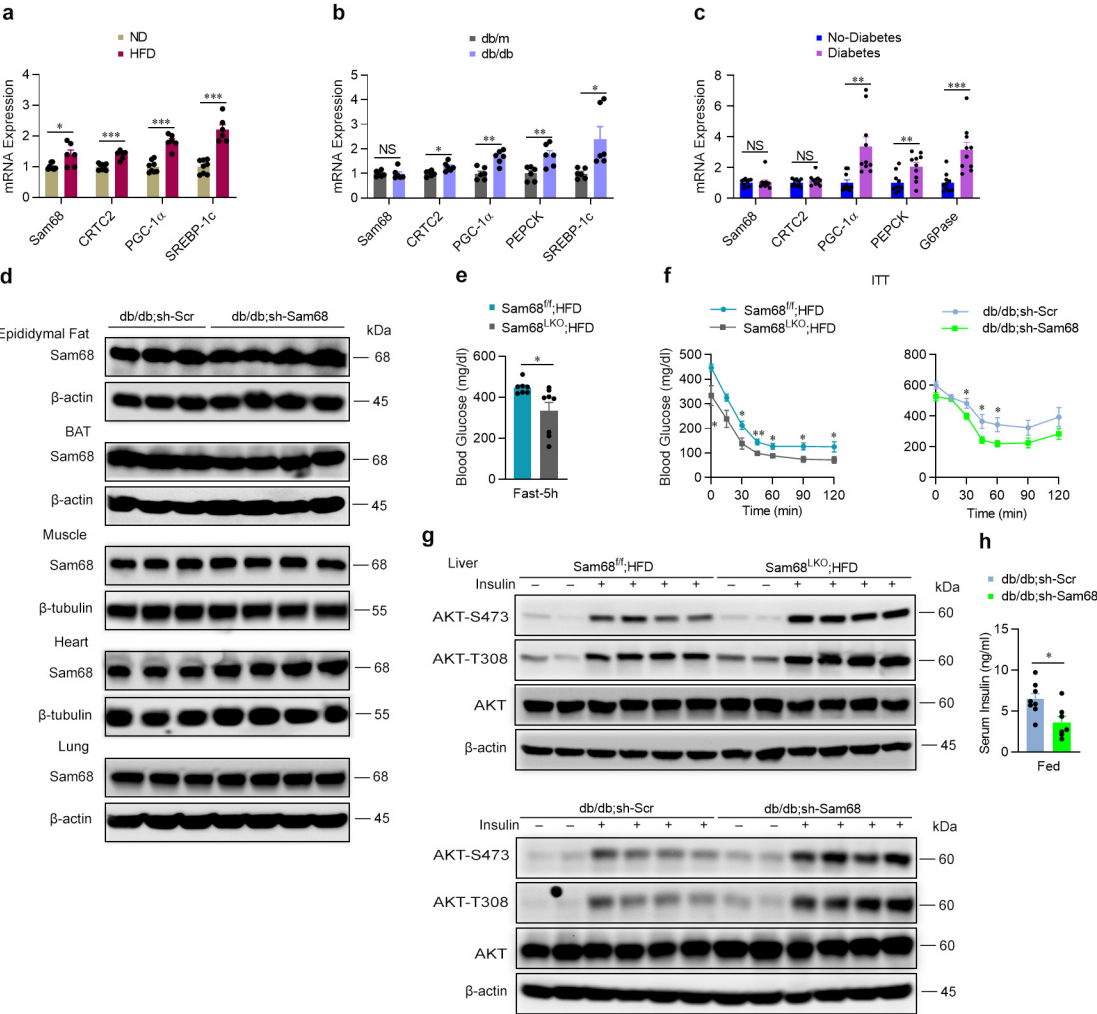

**Supplementary Fig. 6: Hepatic Sam68 inactivation reduces gluconeogenic gene expression and blood-glucose levels in diabetic mice.** (a-b) mRNA expression of *Sam68*, *CRTC2*, and *SREBP-1c*, and gluconeogenic genes was evaluated via qRT-PCR in the livers of (a) WT mice fed a normal diet (ND, n=8) or a HFD (n=6) for 3 months and (b) *db/db* (n=6) and control *db/m* (n=6) mice at age 2-3 months. (c) mRNA expression of *Sam68*, *CRTC2*, and gluconeogenic genes was measured in the livers of patients with or without diabetes (n=10 per group). (d) Sam68 protein levels were evaluated in the epididymal fat, brown fat, skeletal muscle, heart, and lung of *db/db*;sh-Scr and *db/db*;sh-Sam68 mice. (e-f) Blood glucose levels were measured in (e) *Sam68<sup>fl/fl</sup>*;HFD (n=7) and *Sam68<sup>LKO</sup>*;HFD (n=8) mice after 5 h of fasting and in (f) *Sam68<sup>fl/fl</sup>*;HFD (n=7), *Sam68<sup>LKO</sup>*;HFD (n=8), *db/db*;sh-Scr (n=8) and *db/db*;sh-Sam68 (n=8) mice during the insulin tolerance test (ITT). (g) Mice were treated with (+) or without (–) insulin (1 U/kg), and protein levels of phosphorylated AKT (at amino acids S473 and T308) and total AKT were evaluated 20 min later. (h) Serum insulin levels in *db/db*;sh-Scr (n=8) and *db/db*;sh-Sam68 (n=7) at feeding condition. Data are expressed as mean ± standard error of the mean (s.e.m.) \*p<0.05, \*\*p<0.01, \*\*\*p<0.001, NS, not significant (a-c, e, h: unpaired two-sided *t* test, f: two-way ANOVA). Source data are provided as a Source Data file.

## Supplementary Tables

**Supplementary Table 1: Demographic information of diabetic and non-diabetic patients**

| <b>Age (years)</b> | <b>Sex</b> | <b>Ethnicity</b> | <b>Diabetes</b> | <b>Medications</b> |
|--------------------|------------|------------------|-----------------|--------------------|
| 48                 | Female     | Caucasian        | Yes             | Metformin          |
| 36                 | Female     | Caucasian        | Yes             | Metformin          |
| 56                 | Female     | Caucasian        | Yes             | Metformin          |
| 78                 | Female     | Caucasian        | Yes             | Metformin          |
| 68                 | Female     | Caucasian        | Yes             | Metformin          |
| 74                 | Female     | Asian            | Yes             | Metformin          |
| 54                 | Male       | Caucasian        | Yes             | Insulin            |
| 58                 | Male       | Caucasian        | Yes             | Insulin            |
| 73                 | Male       | Caucasian        | Yes             | Insulin            |
| 71                 | Male       | African American | Yes             | Metformin          |
|                    |            |                  |                 |                    |
| 49                 | Female     | Caucasian        | No              | N/A                |
| 41                 | Female     | Caucasian        | No              | N/A                |
| 44                 | Female     | Caucasian        | No              | N/A                |
| 31                 | Female     | Caucasian        | No              | N/A                |
| 46                 | Female     | African American | No              | N/A                |
| 32                 | Female     | Caucasian        | No              | N/A                |
| 52                 | Female     | Caucasian        | No              | N/A                |
| 42                 | Female     | African American | No              | N/A                |
| 62                 | Female     | Caucasian        | No              | N/A                |
| 50                 | Female     | Caucasian        | No              | N/A                |

**Supplementary Table 2: List of antibodies**

| <b>Name</b>                          | <b>Catalogue Number</b> | <b>Company Name</b> | <b>Dilution</b> |
|--------------------------------------|-------------------------|---------------------|-----------------|
| PGC-1 $\alpha$                       | ab54481                 | Abcam               | 1:1000          |
| G6Pase                               | ab83690                 | Abcam               | 1:1000          |
| Sam68 for WB                         | ab76472                 | Abcam               | 1:5000          |
| PEPCK                                | 12940                   | Cell Signaling      | 1:1000          |
| FOXO1                                | 2880                    | Cell Signaling      | 1:1000          |
| $\beta$ -actin                       | 8457                    | Cell Signaling      | 1:1000          |
| Lamin A/C                            | 4777                    | Cell Signaling      | 1:1000          |
| $\alpha$ -tubulin                    | 2144                    | Cell Signaling      | 1:1000          |
| $\beta$ -tubulin                     | 2146                    | Cell Signaling      | 1:1000          |
| Myc-Tag                              | 2276                    | Cell Signaling      | 1:1000          |
| p-AKT (Thr308)                       | 2965                    | Cell Signaling      | 1:1000          |
| p-AKT (Ser473)                       | 4060                    | Cell Signaling      | 1:1000          |
| AKT                                  | 9272                    | Cell Signaling      | 1:1000          |
| p-CREB (Ser133)                      | 9196                    | Cell Signaling      | 1:1000          |
| CREB                                 | 9197                    | Cell Signaling      | 1:1000          |
| Phospho-(Ser/Thr) PKA substrate      | 9621                    | Cell Signaling      | 1:1000          |
| LC3B                                 | 2775                    | Cell Signaling      | 1:1000          |
| CRTC1                                | 2587                    | Cell Signaling      | 1:1000          |
| CRTC3                                | 2720                    | Cell Signaling      | 1:1000          |
| Anti-mouse IgG, HRP-linked antibody  | 7076                    | Cell Signaling      | 1:5000          |
| Anti-rabbit IgG, HRP-linked antibody | 7074                    | Cell Signaling      | 1:5000          |
| HA-Tag                               | 26183                   | Thermo Fisher       | 1:2000          |
| CRTC2 for WB                         | PA5-72994               | Thermo Fisher       | 1:1000          |
| GcR                                  | ABS551MI                | Thermo Fisher       | 1:2000          |
| HNF4 $\alpha$                        | MA1199                  | Thermo Fisher       | 1:1000          |
| Flag-Tag                             | F3165                   | Sigma-Aldrich       | 1:5000          |
| CRTC2 for IP                         | sc-271912               | Santa Cruz          | N/A             |
| Normal mouse IgG-AC                  | sc-2343                 | Santa Cruz          | N/A             |
| Sam68 (7-1) for IP                   | sc-1238                 | Santa Cruz          | N/A             |
| Ubiquitin                            | VU101                   | LifeSensors         | 1:500           |
| P62/SQSTM1                           | NBP1-48320              | Novusbio            | 1:1000          |

**Supplementary Table 3: List of primers**

|                                                       | Forward sequence          | Reverse sequence          |
|-------------------------------------------------------|---------------------------|---------------------------|
| <b>For assessment of gene expression with qRT-PCR</b> |                           |                           |
| mSREBP-1c                                             | GGAGCCATGGATTGCACATT      | GGCCCGGGAAGTCACTGT        |
| mPGC-1 $\alpha$                                       | AGCCGTGACCACTGACAACGAG    | GCTGCATGGTTCTGAGTGCTAAG   |
| mPEPCK                                                | CCACAGCTGCTGCAGAACA       | GAAGGGTCGCATGGCAAA        |
| mG6pase                                               | TGGGCAAAATGGCAAGGA        | TCTGCCCCAGGAATCAAAAAT     |
| mCRTC1                                                | CATGATGGAGAACGCCATCAG     | CACCGTGAGGATGATGTTGGG     |
| mCRTC2                                                | TTTGGGCATCAGTGGAGGTC      | CCTGGAGGTTGGGATTGCTT      |
| mCRTC3                                                | CACAGTCAGACTTCCAGCTC      | ATGGGTTTGGTCTCAAGTGG      |
| mPkar1 $\alpha$                                       | CCCTCGAGTCAGTACGGATG      | GCATTCCTTCGGGAATACTTT     |
| mPkar2 $\alpha$                                       | CCTCCTCTTCTTCATCAGGG      | GAGTGACTCGGACTCGGAAG      |
| mPkar2 $\beta$                                        | GATCATCGGTTTTGGGATGT      | ATAAACCGGTTACAAGGCG       |
| mPkar $\alpha$                                        | ATTCTGAGAAGGGGTCTCCC      | AAGAAGGGCAGCGAGCAG        |
| mPkar $\beta$                                         | TCCTCAAGCCCAGCATTACT      | CAAGAAAGGCAGCGAAGTG       |
| mGcR                                                  | ATTGGCGATGACCTCAGTGTGA    | GCAATAGTTGGCTATGATGCCG    |
| m $\beta$ -actin                                      | GTATGGAATCCTGTGGCATC      | AAGCACTTGCAGTGCACGAT      |
| mSam68                                                | GATATCTGTCAGGAGCAGTTTCT   | CTCCTCGTCCTCTCACAGATA     |
| hPGC-1 $\alpha$                                       | AACAGCAGCAGAGACAAATGCACC  | TGCAGTTCAGAGAGTTCCACACT   |
| hPEPCK                                                | AAGGAGGATGCCCTGAACCTGAAA  | TGCACCTTATGGATGGGAAAGGGA  |
| hG6Pase                                               | TGAATGGCTGCAGTGACCCAGATA  | TGGATGTGGAGCCAGTGGAAGAAT  |
| hCRTC2                                                | CTCTGCCCAATGTAAACCAGAT    | GAGTGCTCCGAGATGAATCC      |
| h $\beta$ -actin                                      | AGGATGCAGAAGGAGATCACTG    | GGGTGTAACGCAACTAAGTCATAG  |
| h-Sam68                                               | GCGAGTGCTGATACCTGTCAAG    | TCATTGAGCCCTTTCCCAAT      |
| <b>For ChIP-qPCR</b>                                  |                           |                           |
| mPGC-1 $\alpha$ -promoter                             | GGGCTGCCTTGGAGTGACGTC     | AGTCCCCAGTCACATGACAAAAG   |
| mG6Pase-promoter                                      | GGAGGGCAGCCTCTAGCACTGTCAA | TCAGTCTGTAGGTCAATCCAGCCCT |
| mPEPCK-promoter                                       | GGCCTCCCAACATTCATTAAC     | GTAGCCCGCCCTCCTTGCTTTA    |
| <b>For generation of Sam68<sup>f/f</sup> mice</b>     |                           |                           |
| 5' arm PCR                                            | CCAAGGCCTCCTCATCTGATG     | GTCTACACACAAAGCCCCGAG     |
| Central fragment                                      | CTGCCCGGCTTCTTGAGTAAG     | TCCCCTACTTGTGGGCTCTAC     |
| 3' arm PCR                                            | TAGCACCAAGCTCCCTCCAAG     | TCCTGTTCCCAACGTCACCAG     |
| ES screening PCR                                      | GATTGCGCAGCGCATCGCCTTCT   | TACCGGTGGATGTGGAATGTG     |
| 5' arm PCR Dig                                        | CAGGGTTTCTCTGTGTAGCCC     | AGTGGCGCACGCCTTTAATCC     |
| F or W genotyping                                     | TTGGGAAAGAGGTATGGCTTGCA   | AAGAAGTTCCTGCCTAACTCTCCC  |
| <b>For genotyping of Sam68<sup>LKO</sup> mice</b>     |                           |                           |
| Alb-Cre                                               | TGCCTGCATTACCGGTGCATGC    | CCATGAGTGAACGAACCTGGTCG   |
| <b>For genotyping of Sam68<sup>AN-Tg</sup> mice</b>   |                           |                           |
| Exon6F-Exon7R                                         | TAGAGGAGCTTTGGTTCGTG      | AATAGCCTTCATAGCCTTCG      |
